# Supplementary material for: Asymmetric reinforcement learning facilitates human inference of transitive relations
Source: PubMed Central journal article supplement (PMC9038534; doi:10.1038/s41562-021-01263-w), 2022-01-31
Supplement: 41562_2021_1263_MOESM1_ESM.pdf [file 41562_2021_1263_MOESM1_ESM.pdf]

---

**Supplementary information**

---

**Asymmetric reinforcement learning facilitates human inference of transitive relations**

---

In the format provided by the authors and unedited

# Asymmetric reinforcement learning facilitates human inference of transitive relations

Simon Ciranka<sup>1,2\*</sup>, Juan Linde-Domingo<sup>1\*</sup>, Ivan Padezhki<sup>1</sup>, Clara Wicharz<sup>1</sup>, Charley M. Wu<sup>1,3</sup>, and Bernhard Spitzer<sup>1,2\*\*</sup>

## Supplementary Information

<sup>1</sup>Center for Adaptive Rationality, Max Planck Institute for Human Development, Berlin, Germany

<sup>2</sup>Max Planck UCL Centre for Computational Psychiatry and Ageing Research, Berlin, Germany

<sup>3</sup>Human and Machine Cognition Lab, University of Tübingen, Tübingen, Germany

\*These authors contributed equally

\*\*corresponding author, email: [spitzer@mpib-berlin.mpg.de](mailto:spitzer@mpib-berlin.mpg.de)

## Supplementary Tables

**Supplementary Table 1.** Tests of mean accuracy on non-neighbour trials against chance (Wilcoxon signed-rank tests against 0.5) in the individual experiments with partial feedback.

|              | z     | n  | r    | 95% CI       | p-value |
|--------------|-------|----|------|--------------|---------|
| Experiment 2 | -4.68 | 31 | 0.84 | [0.75,0.87]  | <.001   |
| Experiment 3 | -6.00 | 48 | 0.87 | [0.85, 0.87] | <.001   |
| Experiment 4 | -6.08 | 49 | 0.87 | [0.87,0.87]  | <.001   |

**Supplementary Table 2.** Fit of symmetric models (Q1, Q1\*, Q1\*+P, Q1\*+Pi) tested against their asymmetric counterparts (Wilcoxon signed-rank tests comparing BICs, aggregated across Experiments 2-4 with partial feedback).

|                   | z     | n   | r    | 95% CI       | p-value |
|-------------------|-------|-----|------|--------------|---------|
| Q1 vs. Q2         | -4.06 | 128 | 0.36 | [0.19, 0.50] | <.001   |
| Q1* vs. Q2*       | -8.53 | 128 | 0.75 | [0.67, 0.81] | <.001   |
| Q1*+P vs. Q2*+P   | -7.79 | 128 | 0.69 | [0.59, 0.76] | <.001   |
| Q1*+Pi vs. Q2*+Pi | -7.08 | 128 | 0.63 | [0.52, 0.72] | <.001   |

**Supplementary Table 3.** Fit of symmetric versus asymmetric models (Wilcoxon signed-rank tests comparing BICs) in the individual experiments with partial feedback.

|              | z     | n  | r    | 95% CI       | p-value |
|--------------|-------|----|------|--------------|---------|
| Experiment 2 | -4.67 | 31 | 0.76 | [0.57, 0.85] | <.001   |
| Experiment 3 | -5.02 | 48 | 0.67 | [0.49, 0.80] | <.001   |
| Experiment 4 | -5.37 | 49 | 0.70 | [0.54,0.81]  | <.001   |

**Supplementary Table 4.** Fit of previously proposed models compared to our winning model Q2\*+P (Wilcoxon signed-rank tests comparing BICs, aggregated across Experiments 2-4).

|           | z     | n   | r    | 95% CI       | p-value |
|-----------|-------|-----|------|--------------|---------|
| VAT       | -7.40 | 128 | 0.65 | [0.55, 0.74] | <.001   |
| RL-ELO    | -8.70 | 128 | 0.76 | [0.70, 0.82] | <.001   |
| VAT2+P    | -2.45 | 128 | 0.22 | [0.06,0.39]  | .014    |
| RL-ELO2+P | -3.73 | 128 | 0.33 | [0.16,0.48]  | <.001   |

# Supplementary Methods

## RL-ELO

When fitting RL-ELO, we replaced our Q-learning process (*Methods: Item-level learning, Eq. 1*) by a rank learning process as proposed by Kumaran and colleagues<sup>1</sup>

$$\begin{aligned}V_{t+1}(i) &= V_t(i) + \alpha [1 - CP_{win,t}] \\V_{t+1}(j) &= V_t(j) + \alpha [-1 + CP_{win,t}]\end{aligned}$$

where  $V(i)$  and  $V(j)$  are the ranks of the winning item  $i$  and the losing item  $j$ ,  $CP_{win}$  is the probability of choosing the winning item, and  $\alpha$  is the learning rate.  $CP_{win}$  was computed with a logistic choice function (analogous to Eq. 5) of the difference in ranks between the winning and the losing item  $[V(i) - V(j)]$ .

## Value-transfer

The value transfer model (VAT) proposed by von Fersen and colleagues<sup>2</sup> assumes that the value of the losing item is updated with a proportion of the value of the winning item. We implemented VAT in a similar form as described previously<sup>1</sup>:

$$\begin{aligned}V_{t+1}(i) &= V_t(i) + \alpha [1 - V_t(i)] \\V_{t+1}(j) &= V_t(j) + \alpha [-1 - V_t(j)] + V_t(i) * \theta\end{aligned}$$

where  $V(i)$  and  $V(j)$  are the values of the winning item  $i$  and the losing item  $j$ ,  $\alpha$  is the learning rate, and  $\theta$  controls the value transfer from the winning to the losing item. Interestingly, this formulation of VAT incorporates a form of asymmetric learning (through value transfer from winner to loser but not vice versa), and it can even predict below-chance performance for certain item pairings (through exceedingly large values of  $\theta$ ), similar to our Q2\* model family. However, the Q2\* process provided a better description of our empirical data (see *Results*).

For comparisons with our winning model (Q2\*+P), we additionally fitted extended variants of RL-ELO and VAT where we included separate learning rates for winner and losers ( $\alpha^+$  and  $\alpha^-$ , analogous to our model Q2, see *Methods*, equation 3) as well as pair-level learning (+P, equations 6-7 and 9-10).

## References

1. Kumaran, D., Banino, A., Blundell, C., Hassabis, D. & Dayan, P. Computations Underlying Social Hierarchy Learning: Distinct Neural Mechanisms for Updating and Representing Self-Relevant Information. *Neuron* **92**, 1135–1147 (2016).
2. von Fersen, L., Wynne, C. D., Delius, J. D. & Staddon, J. E. Transitive inference formation in pigeons. *Journal of Experimental Psychology: Animal Behavior Processes* **17**, 334–341 (1991).
