# Supplementary material for: Asymmetric reinforcement learning facilitates human inference of transitive relations
Source: PubMed Central journal article supplement (PMC9038534; doi:10.1038/s41562-021-01263-w), 2022-01-31
Supplement: 41562_2021_1263_MOESM2_ESM.pdf [file 41562_2021_1263_MOESM2_ESM.pdf]

## Reporting Summary

Nature Research wishes to improve the reproducibility of the work that we publish. This form provides structure for consistency and transparency in reporting. For further information on Nature Research policies, see our [Editorial Policies](#) and the [Editorial Policy Checklist](#).

### Statistics

For all statistical analyses, confirm that the following items are present in the figure legend, table legend, main text, or Methods section.

n/a Confirmed

- |                                     |                                     |                                                                                                                                                                                                                                                            |
|-------------------------------------|-------------------------------------|------------------------------------------------------------------------------------------------------------------------------------------------------------------------------------------------------------------------------------------------------------|
| <input type="checkbox"/>            | <input checked="" type="checkbox"/> | The exact sample size ( $n$ ) for each experimental group/condition, given as a discrete number and unit of measurement                                                                                                                                    |
| <input type="checkbox"/>            | <input checked="" type="checkbox"/> | A statement on whether measurements were taken from distinct samples or whether the same sample was measured repeatedly                                                                                                                                    |
| <input type="checkbox"/>            | <input checked="" type="checkbox"/> | The statistical test(s) used AND whether they are one- or two-sided<br><i>Only common tests should be described solely by name; describe more complex techniques in the Methods section.</i>                                                               |
| <input checked="" type="checkbox"/> | <input type="checkbox"/>            | A description of all covariates tested                                                                                                                                                                                                                     |
| <input type="checkbox"/>            | <input checked="" type="checkbox"/> | A description of any assumptions or corrections, such as tests of normality and adjustment for multiple comparisons                                                                                                                                        |
| <input type="checkbox"/>            | <input checked="" type="checkbox"/> | A full description of the statistical parameters including central tendency (e.g. means) or other basic estimates (e.g. regression coefficient) AND variation (e.g. standard deviation) or associated estimates of uncertainty (e.g. confidence intervals) |
| <input type="checkbox"/>            | <input checked="" type="checkbox"/> | For null hypothesis testing, the test statistic (e.g. $F$ , $t$ , $r$ ) with confidence intervals, effect sizes, degrees of freedom and $P$ value noted<br><i>Give <math>P</math> values as exact values whenever suitable.</i>                            |
| <input checked="" type="checkbox"/> | <input type="checkbox"/>            | For Bayesian analysis, information on the choice of priors and Markov chain Monte Carlo settings                                                                                                                                                           |
| <input checked="" type="checkbox"/> | <input type="checkbox"/>            | For hierarchical and complex designs, identification of the appropriate level for tests and full reporting of outcomes                                                                                                                                     |
| <input type="checkbox"/>            | <input checked="" type="checkbox"/> | Estimates of effect sizes (e.g. Cohen's $d$ , Pearson's $r$ ), indicating how they were calculated                                                                                                                                                         |

*Our web collection on [statistics for biologists](#) contains articles on many of the points above.*

### Software and code

Policy information about [availability of computer code](#)

Data collection

Exp. 1-2: Matlab R2017a (MathWorks), Psychophysics Toolbox Version 3 (Brainard, 1997); Exp. 3-4: Psychopy (<https://www.psychopy.org/builder/builder.html>); custom code: <https://doi.org/10.5281/zenodo.5561411>

Data analysis

R (<http://www.R-project.org/>), Matlab R2020a (MathWorks); custom code: <https://doi.org/10.5281/zenodo.5561411>

For manuscripts utilizing custom algorithms or software that are central to the research but not yet described in published literature, software must be made available to editors and reviewers. We strongly encourage code deposition in a community repository (e.g. GitHub). See the Nature Research [guidelines for submitting code & software](#) for further information.

### Data

Policy information about [availability of data](#)

All manuscripts must include a [data availability statement](#). This statement should provide the following information, where applicable:

- Accession codes, unique identifiers, or web links for publicly available datasets
- A list of figures that have associated raw data
- A description of any restrictions on data availability

The data that support the findings of this study are available at: <https://doi.org/10.5281/zenodo.5561411>

## Field-specific reporting

Please select the one below that is the best fit for your research. If you are not sure, read the appropriate sections before making your selection.

Life sciences  Behavioural & social sciences  Ecological, evolutionary & environmental sciences

For a reference copy of the document with all sections, see [nature.com/documents/nr-reporting-summary-flat.pdf](https://www.nature.com/documents/nr-reporting-summary-flat.pdf)

## Behavioural & social sciences study design

All studies must disclose on these points even when the disclosure is negative.

|                   |                                                                                                                                                                                                                                                                                                                                                                                                                                                                                                                                                                                                                                                                                                                                            |
|-------------------|--------------------------------------------------------------------------------------------------------------------------------------------------------------------------------------------------------------------------------------------------------------------------------------------------------------------------------------------------------------------------------------------------------------------------------------------------------------------------------------------------------------------------------------------------------------------------------------------------------------------------------------------------------------------------------------------------------------------------------------------|
| Study description | Quantitative experimental (four experiments) and computational modeling /simulation                                                                                                                                                                                                                                                                                                                                                                                                                                                                                                                                                                                                                                                        |
| Research sample   | Participants in Exp. 1 and 2 were healthy young adults recruited from a participant pool at the Max Planck Institute for Human Development in Berlin, Germany. Of these, n=20 participated in Experiment 1, (13 female, 7 male, mean age 27.15 ± 3.91 years) and n=35 participated in Exp. 2 (14 female, 27 ± 3.80 years). Participants in Exp. 3 and 4 were healthy young adults recruited online via Prolific Academic ( <a href="https://www.prolific.co">https://www.prolific.co</a> ) with n=76 completing Exp. 3 (23 female, 24.73 ± 5.40 years) and n=60 completing Exp. 4 (23 female; 25.92 ± 4.54 years). Informed consent was obtained by all participants. The online samples were restricted to English speaking participants. |
| Sampling strategy | Participants were assigned to the different experiments by opportunity sampling. A pilot experiment with partial feedback (cf. supplementary information) suggested that learning asymmetries could be detected in a sample of n=11 participants (p<0.05, comparison of model BICs), which was substantially exceeded in all experiments (1-4). Sampling sizes in the online experiments (3-4) were chosen to be larger than in the in-lab experiments (1-2) due to anticipated higher drop-out rates in online testing.                                                                                                                                                                                                                   |
| Data collection   | Experiments 1 and 2 were conducted in lab, using Psychophysics Toolbox Version 3 (Brainard, 1997) running in MATLAB 2017a. In Exp. 2, we additionally recorded electroencephalography for the purpose of a different research question. The experimenters present during in-lab testing were blind to the object-value associations. Experiments 3 and 4 were conducted online (on <a href="https://www.pavlovia.org">https://www.pavlovia.org</a> ), using Qualtrics ( <a href="https://www.qualtrics.com">https://www.qualtrics.com</a> ) for statement of consent and basic demographics.                                                                                                                                               |
| Timing            | Start and finish of data collection:<br>Exp. 1 from 11th January 2019 to 15th January 2019<br>Exp. 2 from 13th March 2019 to 5th July 2019 (n=28). A second cohort (n=7) was collected for the purpose of EEG recordings from 9th March 2020 to 4th September 2020 (with forced breaks due to COVID-19 pandemic) .<br>Exp. 3 from 1st July 2020 to 4th July 2020.<br>Exp. 4 from 30th September 2020 to 1st October 2020.                                                                                                                                                                                                                                                                                                                  |
| Data exclusions   | The data from participants who did not reach above-chance learning levels were excluded from analysis. The threshold for inclusion was set to 60% correct judgments in the last two blocks of the experiment, which corresponds to a binomial test probability of p<0.01 (uncorrected) compared to chance-level (50%). After exclusion, n=17 (Exp. 1), n=31 (Exp. 2), n=48 (Exp. 3) and n=49 (Exp. 4) participants remained for analysis.                                                                                                                                                                                                                                                                                                  |
| Non-participation | No participants dropped out or declined participation in Exp. 1-2. In Exp. 3-4 (online studies), n=12 (Exp. 3) and n=8 (Exp.4) individuals signed up but did not complete the experiment.                                                                                                                                                                                                                                                                                                                                                                                                                                                                                                                                                  |
| Randomization     | Participants were randomly assigned to the individual experiments (opportunity sampling). The association between stimuli and its value structure was pseudo-randomly assigned to the pictures for each participant. Stimulus pairings (8 neighbors and 20 non-neighbors) were randomly intermixed across trials, with randomized ordering of the elements in a pair (e.g., A-B or B-A).                                                                                                                                                                                                                                                                                                                                                   |

## Reporting for specific materials, systems and methods

We require information from authors about some types of materials, experimental systems and methods used in many studies. Here, indicate whether each material, system or method listed is relevant to your study. If you are not sure if a list item applies to your research, read the appropriate section before selecting a response.

### Materials & experimental systems

| n/a                                 | Involved in the study                                           |
|-------------------------------------|-----------------------------------------------------------------|
| <input checked="" type="checkbox"/> | <input type="checkbox"/> Antibodies                             |
| <input checked="" type="checkbox"/> | <input type="checkbox"/> Eukaryotic cell lines                  |
| <input checked="" type="checkbox"/> | <input type="checkbox"/> Palaeontology and archaeology          |
| <input checked="" type="checkbox"/> | <input type="checkbox"/> Animals and other organisms            |
| <input type="checkbox"/>            | <input checked="" type="checkbox"/> Human research participants |
| <input checked="" type="checkbox"/> | <input type="checkbox"/> Clinical data                          |
| <input checked="" type="checkbox"/> | <input type="checkbox"/> Dual use research of concern           |

### Methods

| n/a                                 | Involved in the study                           |
|-------------------------------------|-------------------------------------------------|
| <input checked="" type="checkbox"/> | <input type="checkbox"/> ChIP-seq               |
| <input checked="" type="checkbox"/> | <input type="checkbox"/> Flow cytometry         |
| <input checked="" type="checkbox"/> | <input type="checkbox"/> MRI-based neuroimaging |

## Human research participants

---

Policy information about [studies involving human research participants](#)

|                            |                                                                                                                                                                                                                                                            |
|----------------------------|------------------------------------------------------------------------------------------------------------------------------------------------------------------------------------------------------------------------------------------------------------|
| Population characteristics | Young healthy adults.                                                                                                                                                                                                                                      |
| Recruitment                | In Exp. 1 and 2, participants were recruited from a participant pool at the Max Planck Institute for Human Development. Participants in Exp. 3 and 4 were recruited online via Prolific Academic ( <a href="http://www.prolific.co">www.prolific.co</a> ). |
| Ethics oversight           | All experiments were approved by the ethics committee of the Max Planck Institute for Human Development and conducted in accordance with the Human Subjects Guidelines of the Declaration of Helsinki.                                                     |

Note that full information on the approval of the study protocol must also be provided in the manuscript.
